# Supplementary material for: A poly-vinyl alcohol aided multiphase Z-scheme ZnO–AgI–CuO nanocomposite as an efficient photocatalyst for dye photodegradation
Source: Royal Society of Chemistry journal article supplement (doi:10.1039/d4ma00357h), 2024-01-01
Supplement: d4ma00357h1.pdf [file d4ma00357h1.pdf]

Research title

## Z-Scheme Poly-vinyl alcohol Aided of Multiphase ZnO-AgI-CuO nanocomposite as efficient Photocatalyst for Dye photo-degradation

Teketel Girma Gindose <sup>a, b</sup>, Tsegaye Belege Atisemea <sup>a, b</sup>, Enyew Amare Zereffa <sup>c\*</sup> and Gebrehiwot Gebreslassie <sup>a, b, d</sup>, Abera Beyene Gebreslassie <sup>a, b, d</sup>,

<sup>a</sup>Department of Industrial Chemistry, Addis Ababa Science and Technology University, P.O. Box 16417, Addis Ababa, Ethiopia.

<sup>b</sup>Department of Industrial Chemistry Nanotechnology Centre of Excellence, Addis Ababa Science and Technology University, P.O. Box 1647, Addis Ababa, Ethiopia.

<sup>c\*</sup>Department of Applied Chemistry, School of Applied Natural Science, Adama Science and Technology University, P.O. Box 1888, Adama, Ethiopia.

<sup>d</sup>School of Mechanical and Electrical Engineering, University of Electronic Science and Technology of china, Chengdu, 611731, china.

Correspondence \*Corresponding Author: Enyew Amare Zereffa<sup>c\*</sup>([eneyew.amare@astu.edu.et](mailto:eneyew.amare@astu.edu.et))

### Supporting information

| samples     | 2θ    | θ     | (hkl) | d-spacing | a     | c     |
|-------------|-------|-------|-------|-----------|-------|-------|
| ZnO         | 31.91 | 15.97 | (002) | 2.811     | 3.349 | 5.207 |
|             | 34.56 | 17.28 | (100) | 2.595     | 3.263 | 5.196 |
|             | 36.39 | 18.19 | (101) | 2.474     | 3.168 | 5.211 |
|             | 47.68 | 23.84 | (110) | 1.914     | 3.248 | 5.196 |
| ZnO-AgI-CuO | 31.84 | 15.91 | (002) | 2.808     | 3.354 | 5.212 |
|             | 34.51 | 17.27 | (100) | 2.598     | 3.266 | 5.199 |
|             | 36.33 | 18.16 | (101) | 2.479     | 3.172 | 5.206 |
|             | 47.62 | 23.81 | (110) | 1.916     | 3.250 | 5.199 |

**Table S1** unit cell parameters

### Average crystallite sizes obtained from XRD

**Table S2)** 2θ values of major peaks, FWHM, Intensity, and Average particle sizes of ZnO and PVA-ZnO-CuO-AgI catalysts

| Sample: ZnO |         |           |                   | Sample: PVA-supported ZnO-CuO-AgI |         |           |                   |
|-------------|---------|-----------|-------------------|-----------------------------------|---------|-----------|-------------------|
| 2θ          | FWHM    | Intensity | Average size (nm) | 2θ                                | FWHM    | Intensity | Average size (nm) |
| 36.39       | 0.21200 | 5686      | 44                | 36.33                             | 0.39640 | 1039      | 24                |
| 34.56       | 0.16150 | 2837      |                   | 34.54                             | 0.37870 | 614       |                   |
| 31.91       | 0.24370 | 3301      |                   | 31.84                             | 0.35430 | 547       |                   |

**Table S3)** 2θ values of major peaks FWHM, Intensity, and Average particle sizes of CuO and AgI nanoparticles.

| Sample: CuO |       |           |                   | Sample: AgI |         |           |                   |
|-------------|-------|-----------|-------------------|-------------|---------|-----------|-------------------|
| 2θ          | FWHM  | Intensity | Average size (nm) | 2θ          | FWHM    | Intensity | Average size (nm) |
| 48.84       | 0.318 | 880       | 29                | 39.31       | 0.13430 | 517       | 66                |
| 38.87       | 0.329 | 3177      |                   | 23.81       | 0.15010 | 503       |                   |
| 35.61       | 0.294 | 3344      |                   | 22.45       | 0.15180 | 389       |                   |

## BET results

**Table S4)** surface area, mean pore diameter, and pore volume of ZnO, CuO, AgI, and PVA-ZnO-CuO- AgI nanomaterials.

| Photocatalyst   | Surface area (m <sup>2</sup> /g) | Mean pore diameter (nm) | Total pore volume (cm <sup>3</sup> /g) |
|-----------------|----------------------------------|-------------------------|----------------------------------------|
| ZnO             | 4.18                             | 11.54                   | 0.0171                                 |
| AgI             | 12.31                            | 14.46                   | 0.0312                                 |
| CuO             | 15.01                            | 16.32                   | 0.0511                                 |
| PVA-ZnO-CuO-AgI | 46.11                            | 32.25                   | 0.3102                                 |

## Band gap and band position for each semiconductor.

**Table (S5)** Absolute electronegativity of the semiconductor ( $\chi$ ), band gap ( $E_g$ ) value, redox potential band edges of VB and CB of the semiconductors

| Sample      | $\chi$ (eV) | $E_g$ (eV) | EVB   | ECB    |
|-------------|-------------|------------|-------|--------|
| ZnO         | 5.79        | 3.25       | 2.915 | -0.335 |
| CuO         | 5.82        | 1.98       | 2.31  | 0.33   |
| AgI         | 5.48        | 2.67       | 2.315 | -0.355 |
| ZnO-CuO-AgI | -           | 2.13       | -     | -      |

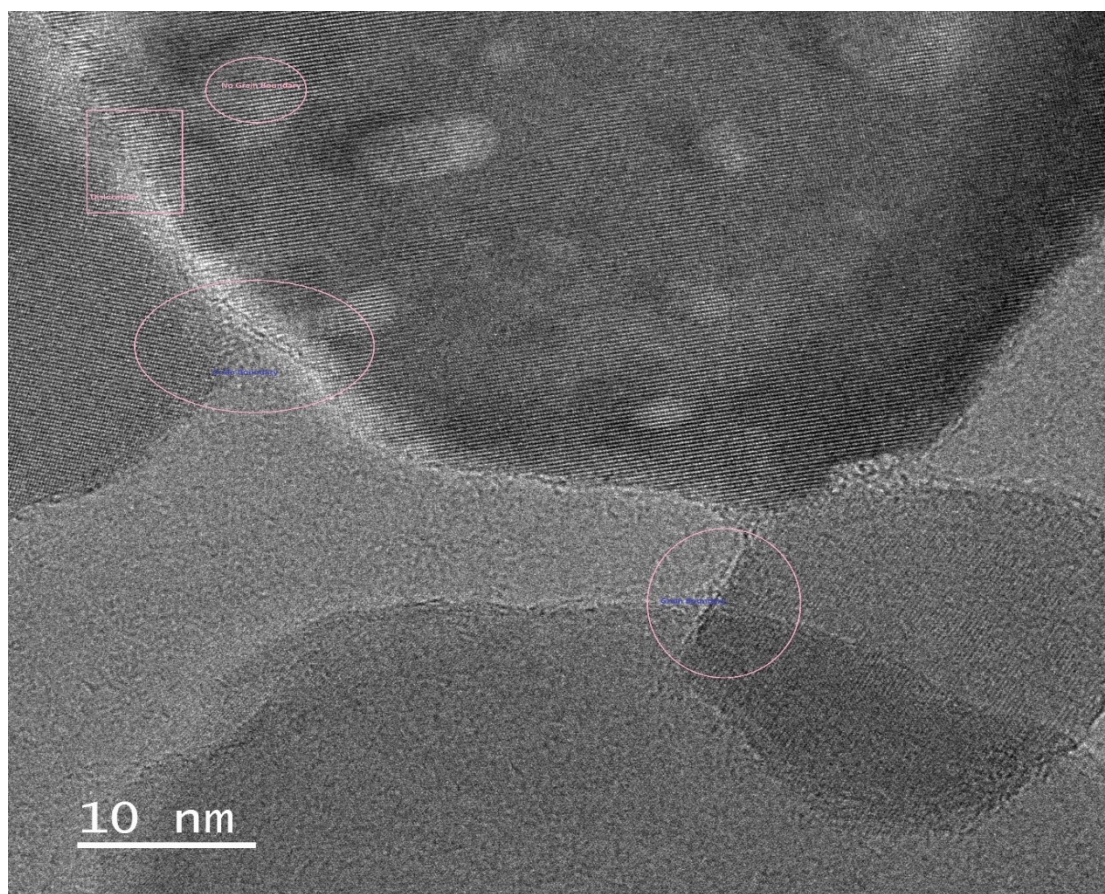

**Fig. S1** HR-TEM of AgI-ZnO-CuO nanocomposite
